## 768 The Role of MRI Texture Analysis in Predicting Outcomes in Locally Advanced Rectal Cancer After Chemoradiotherapy

M. Alrahawy<sup>1,2</sup>, M. Aker<sup>3</sup>, A. Zeinaldin<sup>4</sup>, T. Arulampalam<sup>5,1</sup>

<sup>1</sup>Colchester Hospital University, ESSEX, United Kingdom, <sup>2</sup>Faculty of Medicine, Menoufia University, Egypt., <sup>3</sup>East Suffolk hospital, Bury St Edmunds, United Kingdom, <sup>4</sup>Faculty of Medicine, Menoufia University, Menoufia, Egypt., <sup>5</sup>School of Medicine Anglia Ruskin University, Chelmsford, United Kingdom

**Background:** Locally advanced rectal cancer (LARC) is treated by neo-adjuvant chemoradiotherapy (NCRT) followed by surgery after restaging by magnetic resonance imaging (MRI). Texture analysis (TA) is a novel imaging biomarker that can assess heterogeneity in MRIs. This study hypothesizes that TA has the ability to predict the complete response (CR), survival, local recurrence, and distant metastasis.

**Method:** This is a retrospective analysis of all patients diagnosed with LARC who received NCRT and who have had MRI scans. Six parameters were systematically extracted from Textural histograms of post-treatment scans. Correlation between TA and CR was tested. These parameters were then examined to determine their ability in predicting local recurrence, distant metastases, and survival by means of Kaplan-Meier survival curves and log-rank tests.

**Results:** Four out of the six parameters extracted significantly identified CR. Utilising the same cut-off values across all parameters, three parameters significantly predicted local recurrence: Entropy ( $p = 0.033$ ), mean of positive pixels (MPP) ( $p = 0.045$ ), and Skewness ( $p = 0.018$ ). Four parameters significantly predicted distant metastases: SD ( $p = 0.015$ ), entropy ( $p = 0.017$ ), MPP ( $p = 0.005$ ), and skewness ( $p < 0.001$ ). Four texture parameters significantly predicted survival: SD ( $p = 0.002$ ), entropy ( $p = 0.001$ ), MPP ( $p < 0.001$ ), and skewness ( $p = 0.017$ ).

**Conclusions:** MRI textural features are potentially significant imaging biomarkers in predicting survival, local recurrence, or liver metastases in LARC.
